# Supplementary material for: Peripherally Inserted Central Catheter Placement in a Cardiology Ward: A Focus Group Study of Nurses’ Perspectives
Source: MDPI journal article supplement (doi:10.3390/ijerph18147618), 2021-07-17
Supplement: s1 [file s1]

## Focus Group Guide

Interviewer:

Date:

Time:

Moderator:

Location:

| Introduction                                                                                                                                                                                                                                                                                                                                                                                                                                                                                                                                                                             | Comments                                                                                                                                                                                                                                                                                                                                                                                                       |
|------------------------------------------------------------------------------------------------------------------------------------------------------------------------------------------------------------------------------------------------------------------------------------------------------------------------------------------------------------------------------------------------------------------------------------------------------------------------------------------------------------------------------------------------------------------------------------------|----------------------------------------------------------------------------------------------------------------------------------------------------------------------------------------------------------------------------------------------------------------------------------------------------------------------------------------------------------------------------------------------------------------|
| 1. Brief overview of the TecPrevInf project.                                                                                                                                                                                                                                                                                                                                                                                                                                                                                                                                             | - Consider the current reflection stage of this project.                                                                                                                                                                                                                                                                                                                                                       |
| 2. Description of the Focus Group, addressing: <ul style="list-style-type: none"> <li>a) Its objectives;</li> <li>b) The role of the researcher and moderator during the Focus Group;</li> <li>c) Its structure;</li> <li>d) Data processing;</li> <li>e) Confidentiality.</li> </ul>                                                                                                                                                                                                                                                                                                    |                                                                                                                                                                                                                                                                                                                                                                                                                |
| 3. Permission request to use audio recording for the discussion.                                                                                                                                                                                                                                                                                                                                                                                                                                                                                                                         | - Request permission.                                                                                                                                                                                                                                                                                                                                                                                          |
| 4. Development                                                                                                                                                                                                                                                                                                                                                                                                                                                                                                                                                                           |                                                                                                                                                                                                                                                                                                                                                                                                                |
| 5. Objectives: <ul style="list-style-type: none"> <li>a) To establish the changes in nurses' practices after the introduction of peripherally inserted central venous catheters (PICCs) in the healthcare unit.</li> <li>b) To determine the advantages and disadvantages of PICCs.</li> <li>c) To identify the factors that hindered or promoted the use of PICCs.</li> <li>d) To understand the perception of the nursing team on adherence to the PICC medical device.</li> <li>e) To establish the relevant actions that should be implemented to improve PICC adherence.</li> </ul> | - Contextualise within the TecPrevInf project.                                                                                                                                                                                                                                                                                                                                                                 |
| 6. Questions: <ul style="list-style-type: none"> <li>a) Which advantages and disadvantages does the PICC technology provide to patients and the nursing team?</li> <li>b) What factors may have influenced the nursing team to adhere to PICCs?</li> <li>c) Which relevant efforts should be implemented to encourage the nursing team to adhere to PICCs and improve nurses' practices in this area?</li> </ul>                                                                                                                                                                         | Approach: <ul style="list-style-type: none"> <li>- Develop the questions to suit the characteristics of the group.</li> <li>- Emit verbal and non-verbal signals of attention and understanding.</li> <li>- Ask for clarifications on understanding the phenomenon.</li> <li>- Help with follow-up questions, if necessary.</li> <li>- Add other pertinent questions, bearing in mind the objective</li> </ul> |

---

|                                                                                                       |                                                                                       |
|-------------------------------------------------------------------------------------------------------|---------------------------------------------------------------------------------------|
|                                                                                                       | and based on what is reported.<br>- Allow everyone to participate in the focus group. |
| 7. Closing:<br>a) Summarize the discussed topics.<br>b) Allow the group to add or explain some point. | - Thank the group for their trust and cooperation.                                    |

---
